# Supplementary material
Source: PubMed Central journal article supplement (PMC3646865)
Supplement: cc-12-1091-s01.pdf [file cc-12-1091-s01.pdf]

## **Supplemental Material to:**

**Sina Gogolin, Volker Ehemann, Gabriele Becker, Lena M. Brueckner, Daniel Dreidax, Steffen Bannert, Ingo Nolte, Larissa Savelyeva, Emma Bell and Frank Westermann**

**CDK4 inhibition restores G<sub>1</sub>-S arrest in MYCN-amplified neuroblastoma cells in the context of doxorubicin-induced DNA damage**

**2013; 12(7)**

**<http://dx.doi.org/10.4161/cc.24091>**

**<http://www.landesbioscience.com/journals/cc/article/24091>**

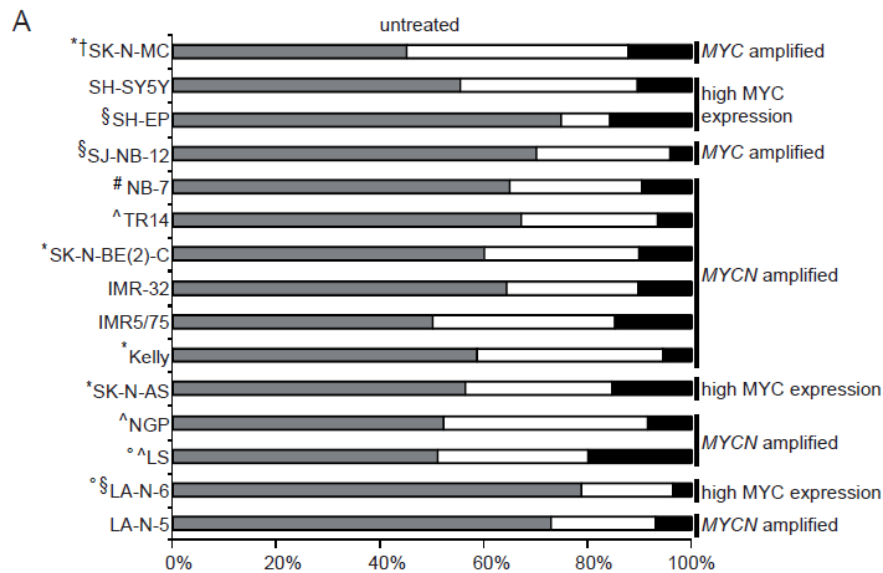

**Figure S1.** Impaired drug-induced DNA damage response in neuroblastoma cells. (A and B) Cell cycle distribution 48h after doxo treatment and of control cells (=untreated) using flow cytometry.

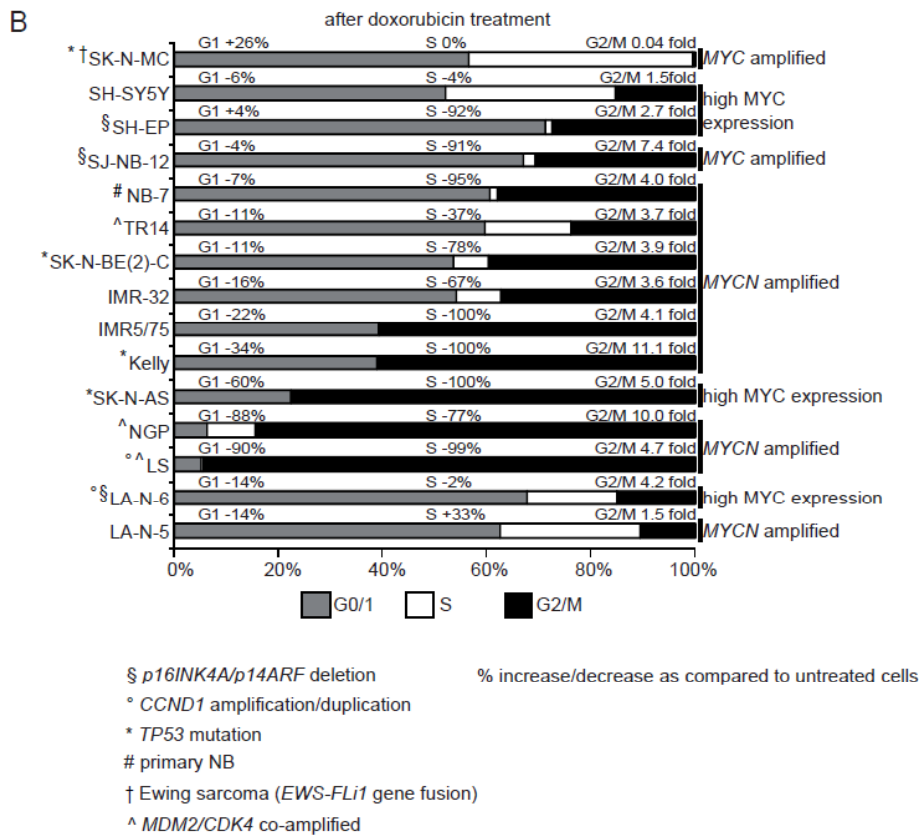

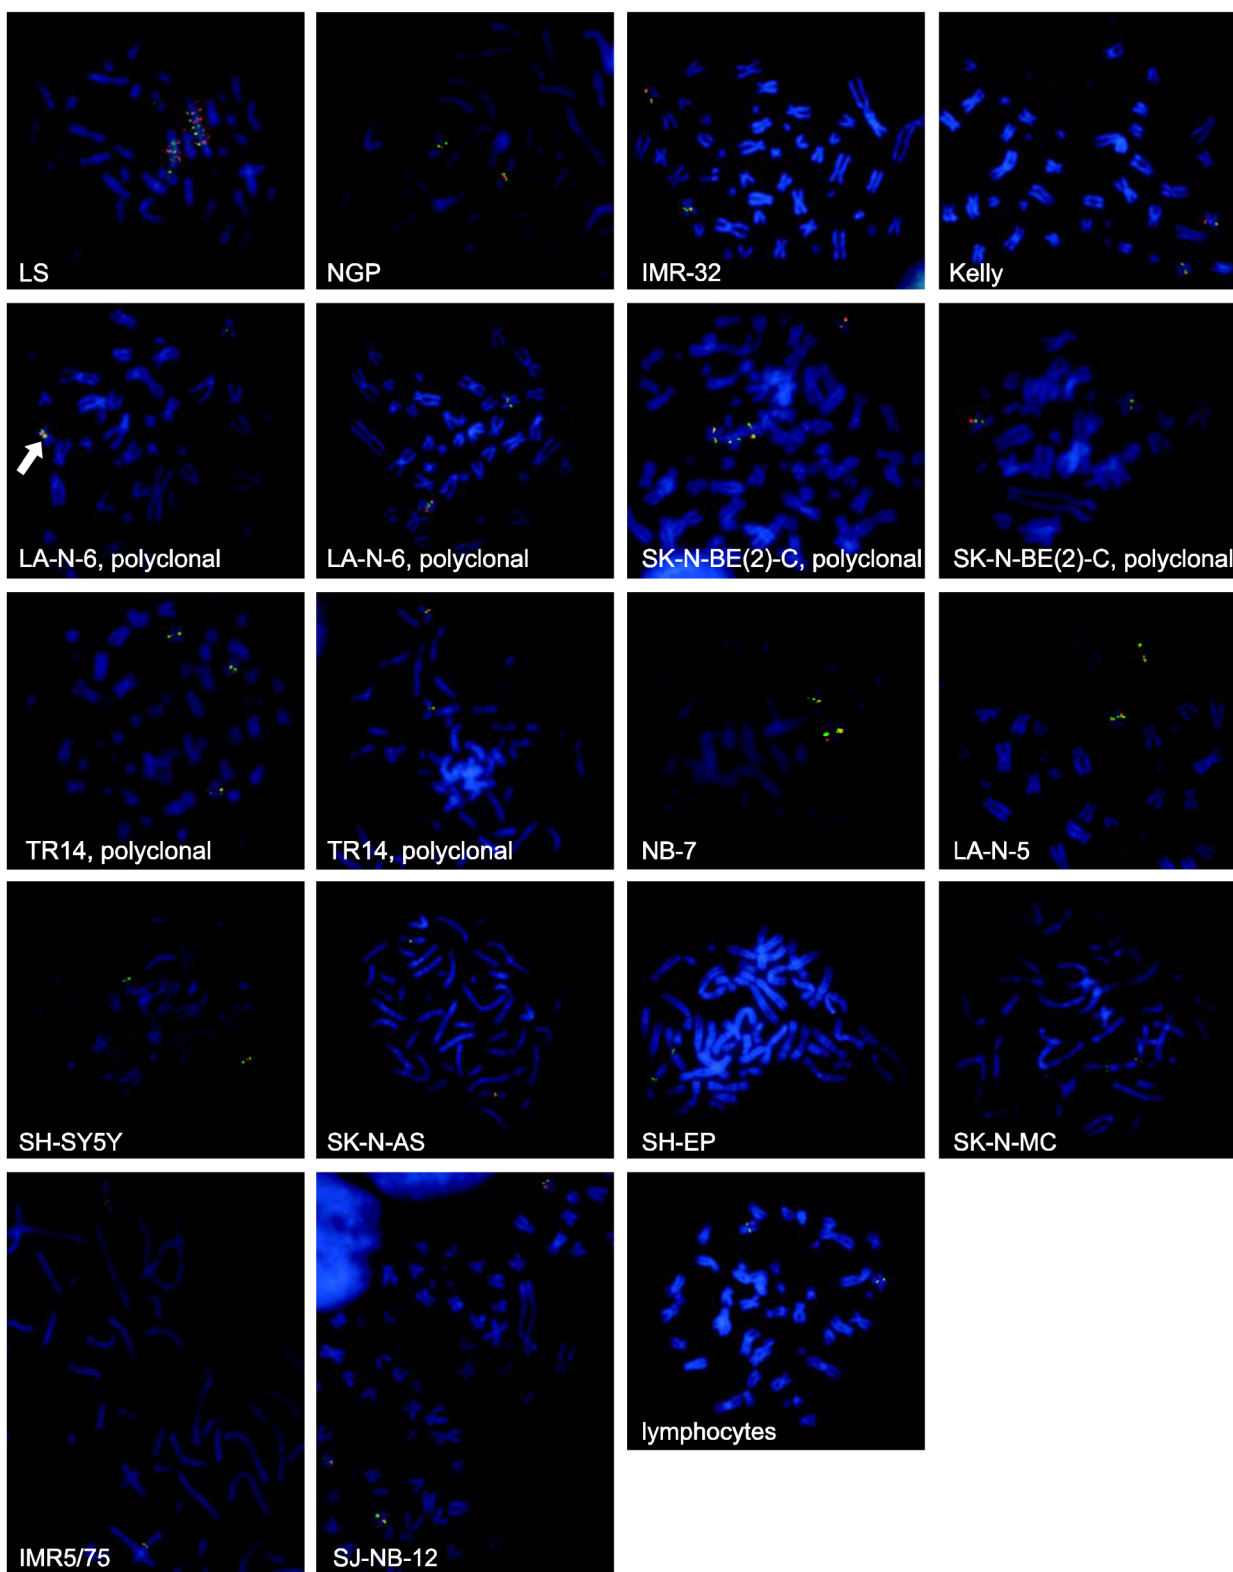

**Figure S2.** *CCND1* status using FISH. *CCND1* gene status is shown by Cy3-staining (red). FITC (green) fluorescence signal covers the neighboring region to *CCND1*; DNA is stained by DAPI (blue). FISH analysis shows a *CCND1* amplicon in both der(12) chromosomes of LS cells and *CCND1* duplication in polyclonal LA-N-6 (see white arrow). SK-N-BE(2)-C consists of a tetraploid (four chromosomes 11) and diploid (two chromosomes 11) cell clone. TR14 consists of a triploid (three chromosomes 11) and a diploid (two chromosomes 11) cell clone. SJ-NB-12 cells are triploid for chromosome 11. The other cell lines and control lymphocytes harbor two chromosomes 11 and show normal *CCND1* status.

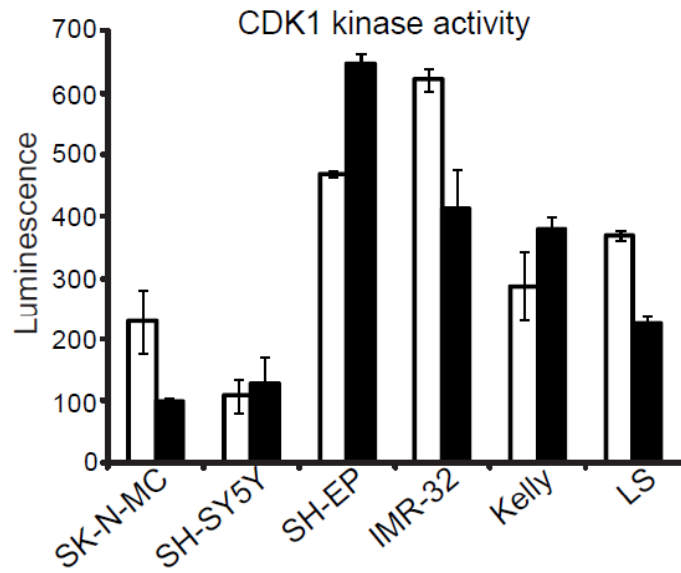

**Figure S3.** High CDK1 activity after doxorubicin treatment in *MYCN*-amplified cells. CDK1 activity was analyzed 48h after treatment using histone 1 as substrate. Luminescence directly correlates to the amount of produced ADP, indicative for kinase activity. Data are presented as mean  $\pm$ SD of duplicates.

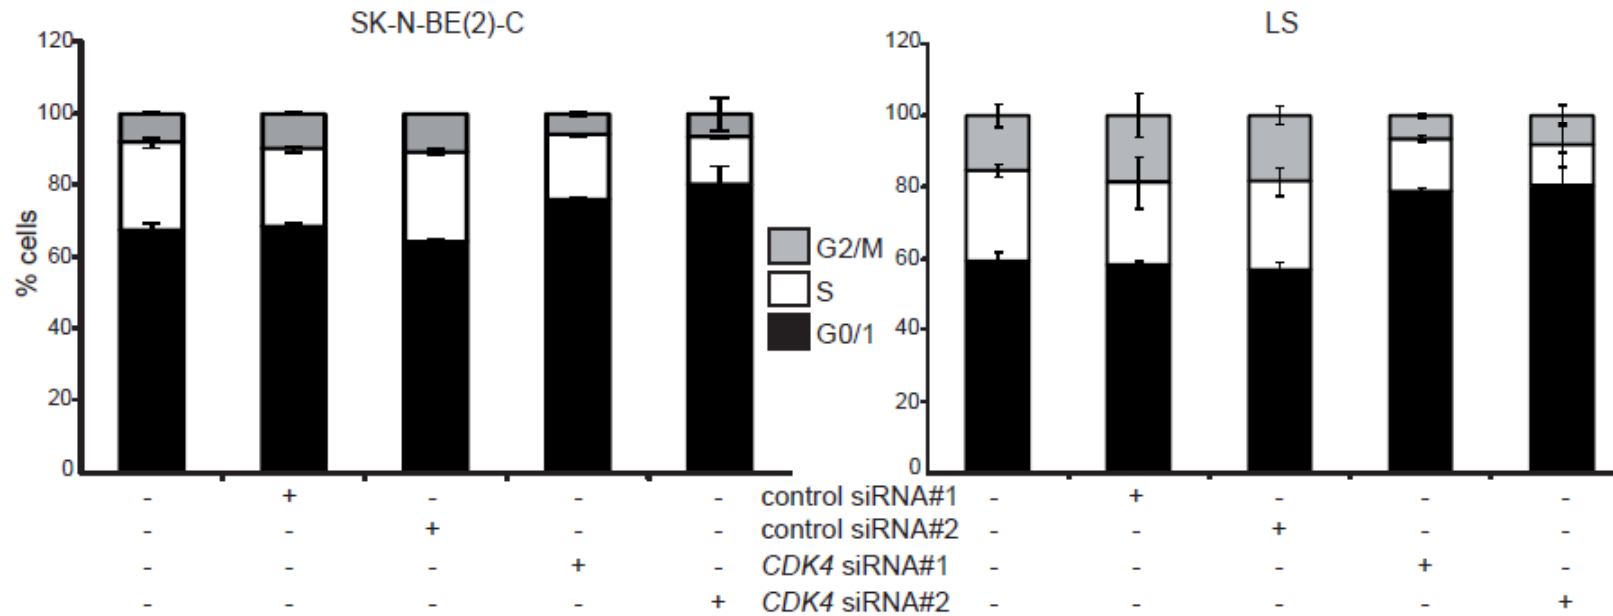

**Figure S4.** Silencing of *CDK4* by transient siRNA. Control experiment related to *CDK4* knockdown in combination with doxo treatment as shown in Figure 3B. Cells were transfected with one of two unrelated control siRNAs or one of four siRNAs targeting *CDK4*. Flow cytometric cell cycle analyses were performed 96h later simultaneously to the doxo counterparts. Data are presented as mean  $\pm$ SD of triplicates.

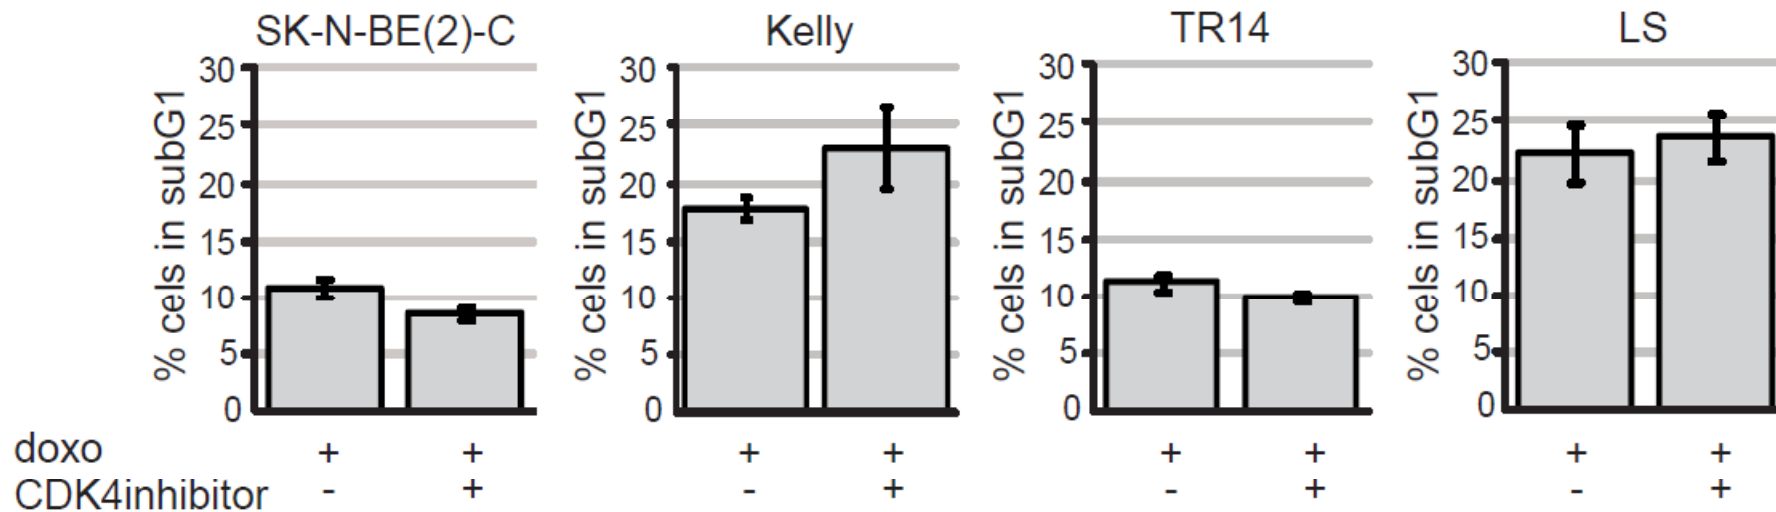

**Figure S5.** CDK4 inhibition has no cooperative cytotoxic effect with doxorubicin in *MYCN*-amplified cells with non-functional p53. Cell death analysis of four neuroblastoma cell lines harboring mutant *TP53* (SK-N-BE(2)-C and Kelly) or amplified *MDM2* (TR14 and LS) 48h after treatment with doxo alone or the combination of doxo and CDK4 inhibitor RO0505124 using flow cytometry. Data are presented as mean  $\pm$ SD of triplicates.

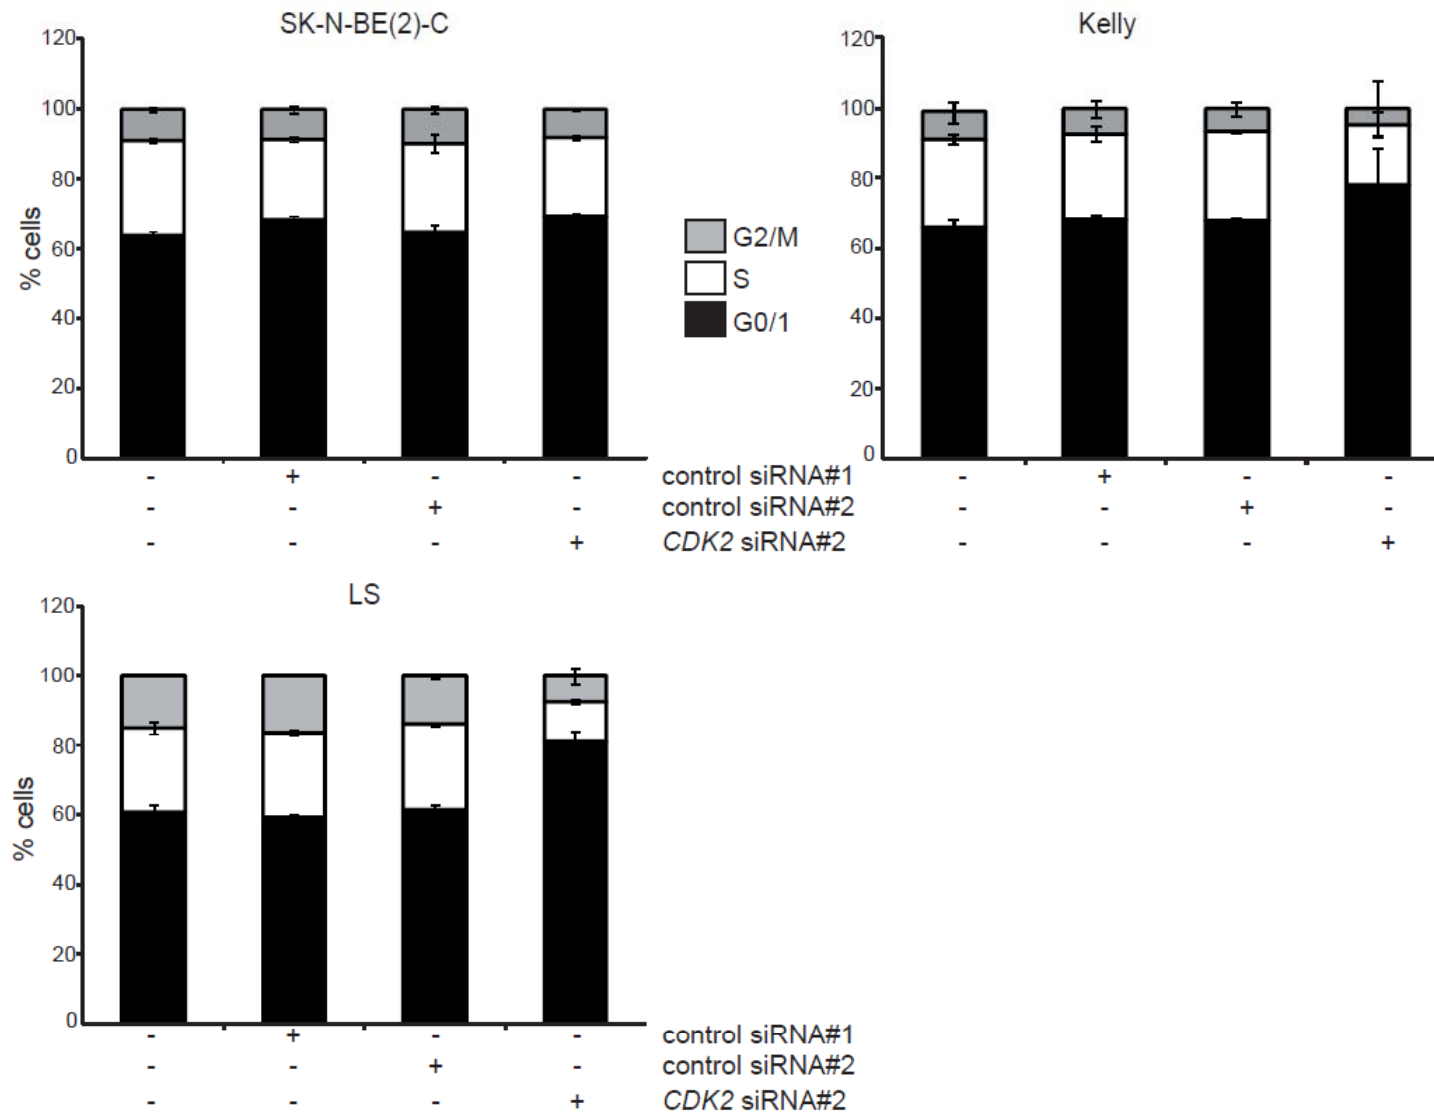

**Figure S6.** Silencing of *CDK2* by transient siRNA. Control experiment related to *CDK4* knockdown in combination with doxo treatment as shown in Figure 4B. Cells were transfected with one of two unrelated control siRNAs or one of four siRNAs targeting *CDK2*. Flow cytometric cell cycle analyses were performed 96h later simultaneously to the doxo counterparts. Data are presented as mean  $\pm$ SD of triplicates.
